# Supplementary material
Source: PubMed Central journal article supplement (PMC4643083)
Supplement: jcav06p1260s1.pdf [file jcav06p1260s1.pdf]

# Hsa-miR-301a-3p Acts as an Oncogene in Laryngeal Squamous Cell Carcinoma via Target Regulation of *Smad4*

Yan Lu, Wei Gao, Chunming Zhang, Shuxin Wen, Hui Huangfu, Jian Kang, Binqun Wang

**Supplementary Table 1.** Patient population and clinicopathological variables of 6 fresh samples

| Variable                              | No. (Percentage) |
|---------------------------------------|------------------|
| <b>Sex</b>                            |                  |
| Male                                  | 5(83.3)          |
| Female                                | 1(16.7)          |
| <b>Age</b>                            |                  |
| ≤63years                              | 2(33.3)          |
| >63 years                             | 4(66.7)          |
| <b>Primary sites</b>                  |                  |
| Supraglottic                          | 1(16.7)          |
| Glottic                               | 5(83.3)          |
| <b>Histologic differentiation</b>     |                  |
| Good                                  | 5(83.3)          |
| Moderate                              | 1(16.7)          |
| <b>Primary tumor</b>                  |                  |
| T1                                    | 4(66.7)          |
| T2                                    | 2(33.3)          |
| <b>Cervical lymph node metastasis</b> |                  |
| N <sub>0</sub>                        | 5(83.3)          |
| N <sub>+</sub>                        | 1(16.7)          |

**Supplementary Table 2.** Patient population and clinicopathological variables of 120 paraffin samples

| <b>Variable</b>                       | <b>No. (Percentage)</b> |
|---------------------------------------|-------------------------|
| <b>Sex</b>                            |                         |
| Male                                  | 108(90.0)               |
| Female                                | 12(10.0)                |
| <b>Age</b>                            |                         |
| ≤61 years                             | 55(45.8)                |
| >61 years                             | 65(54.2)                |
| <b>Median age (years)</b>             | 62.5(range 42–76)       |
| <b>Primary sites</b>                  |                         |
| Supraglottic                          | 59(49.2)                |
| Glottic                               | 57(47.5)                |
| Subglottic                            | 4(3.33)                 |
| <b>Histologic differentiation</b>     |                         |
| Good                                  | 40(33.3)                |
| Moderate                              | 48(40.0)                |
| Poor                                  | 32(26.7)                |
| <b>Primary tumor</b>                  |                         |
| T1                                    | 50(41.7)                |
| T2                                    | 23(19.2)                |
| T3                                    | 37(30.8)                |
| T4                                    | 10(8.33)                |
| <b>Cervical lymph node metastasis</b> |                         |
| N <sub>0</sub>                        | 96(80.0)                |
| N <sub>+</sub>                        | 24(20.0)                |
| <b>Clinical stage</b>                 |                         |
| I                                     | 45(37.5)                |
| II                                    | 20(16.7)                |
| III                                   | 42(35.0)                |
| IV                                    | 13(10.8)                |
